# Supplementary material
Source: PubMed Central journal article supplement (PMC5955855)
Supplement: NIHMS949303-supplement-2.pdf [file NIHMS949303-supplement-2.pdf]

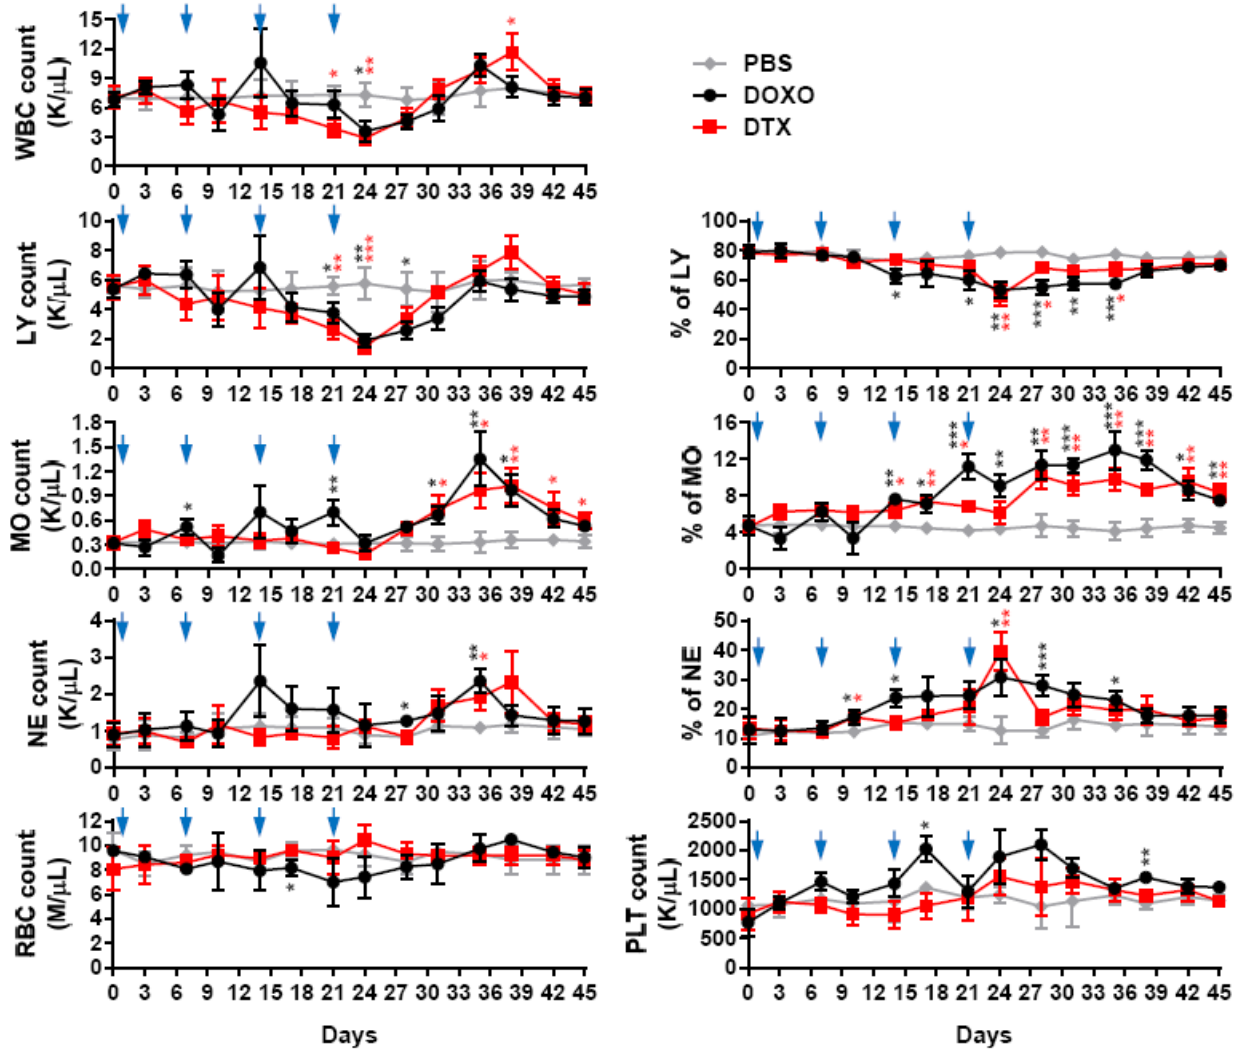

**Supplemental Figure 2.** Complete blood counts showing chemotherapy-induced monocytosis in C57BL/6 mice. C57BL/6 mice received 4 times of treatment with DOXO or DTX, or PBS on days 1, 7, 14, and 21 (blue arrowheads). At each indicated time point, complete blood count was conducted to determine the numbers and percentages of various cell populations ( $n=3$ ). On days 7, 14, and 21, blood was collected before treatment. \* $P<0.05$ , \*\* $P<0.01$ , \*\*\* $P<0.001$  (compared to the PBS group at each time point).
