# Supplementary material
Source: PubMed Central journal article supplement (PMC5955855)
Supplement: NIHMS949303-supplement-3.pdf [file NIHMS949303-supplement-3.pdf]

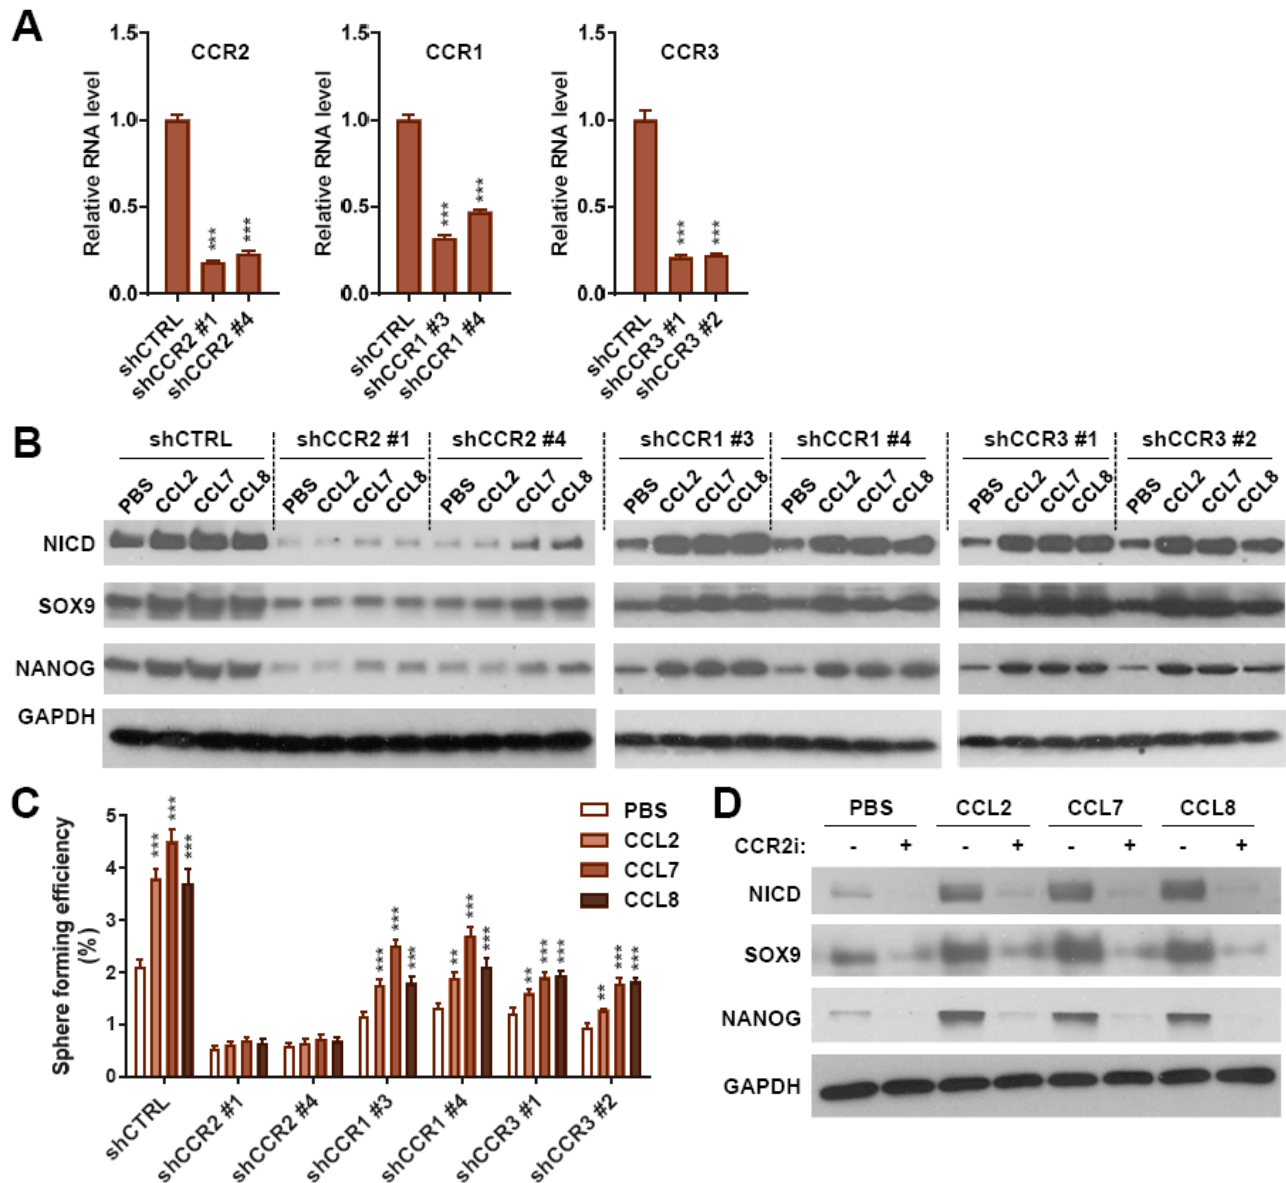

**Supplemental Figure 3.** CCR2 is required for MCP-induced stemness. **(A)** The relative RNA levels of the indicated CCR in MDA-MB-231 cells with stable knockdown of CCR1-3 (shCCR) compared to control cells (shCTRL). Two different shRNAs were used to knock down each CCR. **(B, C)** MDA-MB-231 cells expressing the indicated shRNA constructs were treated with CCL2/7/8 (1 ng/ml) or PBS for 24 h and analyzed by Western blot **(B)** and by sphere formation assay **(C)**.  $*P < 0.01$  compared to the PBS group. **(D)** MDA-MB-231 cells were treated with CCL2/7/8 (1 ng/ml) or PBS for 24 h in the presence of MK-0812 (600 nM) or vehicle before analyzed by Western blot.  $**P < 0.01$ ,  $***P < 0.001$  (compared to the shCTRL group in **A** and to the PBS group in **C**).
